# Supplementary material for: Cognitive Phenotype and Psychopathology in Noonan Syndrome Spectrum Disorders through Various Ras/MAPK Pathway Associated Gene Variants
Source: MDPI journal article supplement (doi:10.3390/jcm11164735), 2022-08-13
Supplement: s1 [file s1]

**Supplementary Table S1.** Neuropsychological tests and questionnaires for each (cognitive) domain.

| Domain                          | Tests or questionnaires                                                                                                                                                                                                                                                                                                                                 |
|---------------------------------|---------------------------------------------------------------------------------------------------------------------------------------------------------------------------------------------------------------------------------------------------------------------------------------------------------------------------------------------------------|
| Intelligence                    | WAIS-III, WAIS-IV, WISC-III, WISC-IV, WISC-V, SON-R 6-40*, RAKIT-2*, KAIT*                                                                                                                                                                                                                                                                              |
| Speed of information processing | Processing Speed Index; WAIS-III, WAIS-IV, WISC-III, WISC-V, SON-R 6-40*<br>Baseline conditions; Stroop Color Word Test, (D-KEFS) Trail Making Test, D-KEFS Color Word Interference Test, d2 Cancellation Test, Bourdon-Vos Test*                                                                                                                       |
| Sustained attention             | d2 Cancellation Test<br>Rapid Visual Information Processing; CANTAB<br>Bourdon-Vos Test*<br>Paced Auditory Serial Addition Task*                                                                                                                                                                                                                        |
| Executive functioning           | Interference condition; Stroop Color Word Test, D-KEFS Color Word Interference Test                                                                                                                                                                                                                                                                     |
| <i>Inhibition</i>               | Inhibition subtests; NEPSY-II*, IDS-2*                                                                                                                                                                                                                                                                                                                  |
| <i>Cognitive flexibility</i>    | Flexibility conditions; (D-KEFS) Trail Making Test, D-KEFS Color Word Interference Test<br>Wisconsin Card Sorting Test<br>Intra-Extra Dimensional Set Shift; CANTAB<br>Flexibility subtests; BADS*, BADS-C*                                                                                                                                             |
| <i>Working memory</i>           | Working Memory Index; WAIS-III, WAIS-IV-NL, WISC-V-NL<br>Subtest Digit Span; WISC-III-NL*<br>Spatial Working Memory, Spatial Span; CANTAB*<br>Circle span task; NETOL*                                                                                                                                                                                  |
| <i>Planning abilities</i>       | Tower of London<br>D-KEFS Tower Test<br>Test Stockings of Cambridge; CANTAB<br>Total score (or separate subtests*); BADS, BADS-C<br>Subtest Mazes; WISC-III, RAKIT-2*<br>Subtest Route Finding; NEPSY-II*                                                                                                                                               |
| Episodic memory                 |                                                                                                                                                                                                                                                                                                                                                         |
| <i>Verbal memory</i>            | Rey Auditory Verbal Learning Test for children and adults<br>Subtests Narrative Memory, Sentence Repetition, Word List Interference; NEPSY-II*<br>Subtests Eight Words Test, Story; NETOL*<br>Subtest Stories; IDS-2*<br>Subtest Stories; Rivermead Behavioural Memory Test – Third Edition*                                                            |
| <i>Visual memory</i>            | Rey-Osterrieth Complex Figure Test<br>Location Learning Test – Revised<br>Paired Associates Learning; CANTAB*<br>Subtests Memory for Designs, Memory for Designs Delayed; NEPSY-II*<br>Subtest Visual Memory; NETOL*<br>Subtests Picture Description, Recognizing Figures, Recognizing Rotated Figures; IDS-2*<br>Visual Association Test (- Extended)* |
| Social cognition                |                                                                                                                                                                                                                                                                                                                                                         |
| <i>Emotion recognition</i>      | Emotion Recognition Task<br>Subtest Affect Recognition; NEPSY-II                                                                                                                                                                                                                                                                                        |
| <i>Mentalizing abilities</i>    | Theory of Mind Test Revised<br>Subtest Theory of Mind; NEPSY-II<br>Faux-Pas Task<br>Strange Stories Test<br>Social Interpretation Test*                                                                                                                                                                                                                 |

# ADOS(-2)\*

|                         |                                                                                                                                                                                                                                                                                                                                                                                                                                                                                                                                                                                                                                                                                                                                                                                                                                                                                                                                                                            |
|-------------------------|----------------------------------------------------------------------------------------------------------------------------------------------------------------------------------------------------------------------------------------------------------------------------------------------------------------------------------------------------------------------------------------------------------------------------------------------------------------------------------------------------------------------------------------------------------------------------------------------------------------------------------------------------------------------------------------------------------------------------------------------------------------------------------------------------------------------------------------------------------------------------------------------------------------------------------------------------------------------------|
| General psychopathology | <p>Screening questionnaires and Structured Clinical Interviews* of the DSM-IV; SCID-I and II</p> <p>Shedler-Westen Assessment Procedure (SWAP)*</p> <p>MMPI-2, MMPI-2-RF, MMPI-A*</p> <p>NEO Personality Inventory-3 (NEO-PI-3)*</p> <p>Screening of the Dimensional Assessment of Personality Pathology (DAPP)*</p> <p>Five-Factor Personality Inventory (FFPI)*</p> <p>Symptom Checklist-90 Revised (SCL-90-R)</p> <p>Outcome Questionnaire (OQ-45)*</p> <p>Spielberger State-trait Anxiety Inventory (ZBV)*</p> <p>FEEL-E*, FEEL-KJ*</p> <p>Scale for Interpersonal Behavior (SIB)</p> <p>Inventory of Interpersonal Situations (IOA)*</p> <p>Beck Depression Inventory-II (BDI-II-NL)</p> <p>Hamilton Rating Scale for Depression (HDRS)*</p> <p>Self-Rating Depression Scale (SDS)*</p> <p>Children's Depression Inventory (CDI)*</p> <p>Child Behavior Checklist (CBCL), Adult Behavior Checklist (ABCL)*</p> <p>Strengths and Difficulties Questionnaire (SDQ)*</p> |
| Alexithymia             | <p>Twenty-item Toronto Alexithymia Scale (TAS-20)</p> <p>Bermond-Vorst Alexithymia Questionnaire (BVAQ)</p> <p>Alexithymia Questionnaire for Children (AQC)*</p>                                                                                                                                                                                                                                                                                                                                                                                                                                                                                                                                                                                                                                                                                                                                                                                                           |

*Note.* More details on the individual tests and their administration, scoring, and norms can be found elsewhere [69,70–72].

\*Tests and questionnaires which were used only occasionally (less than 10 times).

WAIS-III = Wechsler Adult Intelligence Scale third edition; WAIS-IV-NL = Wechsler Adult Intelligence Scale fourth edition; WISC-III-NL = Wechsler Intelligence Scale for Children third edition; WISC-V-NL = Wechsler Intelligence Scale for Children fifth edition; SON-R 6-40 = Non-verbal intelligence test; RAKIT-2 = Revised Amsterdam Children's Intelligence Test; KAIT = Kaufman – Adolescent and Adult Intelligence Test; D-KEFS = Delis-Kaplan Executive Function System; CANTAB = Cambridge Neuropsychological Test Automated Battery; IDS-2 = Intelligence and Development Scales – 2nd Edition; BADS = Behavioural Assessment of the Dysexecutive Syndrome; BADS-C = Behavioural Assessment of the Dysexecutive Syndrome in Children; NETOL = Neuropsychological Test Series for Elderly People with Mild Intellectual Disability; ADOS = Autism Diagnostic Observation Schedule; MMPI = Minnesota Multiphasic Personality Inventories.
