# Supplementary material for: Cognitive Phenotype and Psychopathology in Noonan Syndrome Spectrum Disorders through Various Ras/MAPK Pathway Associated Gene Variants
Source: MDPI journal article supplement (doi:10.3390/jcm11164735), 2022-08-13
Supplement: s1 [file s1]

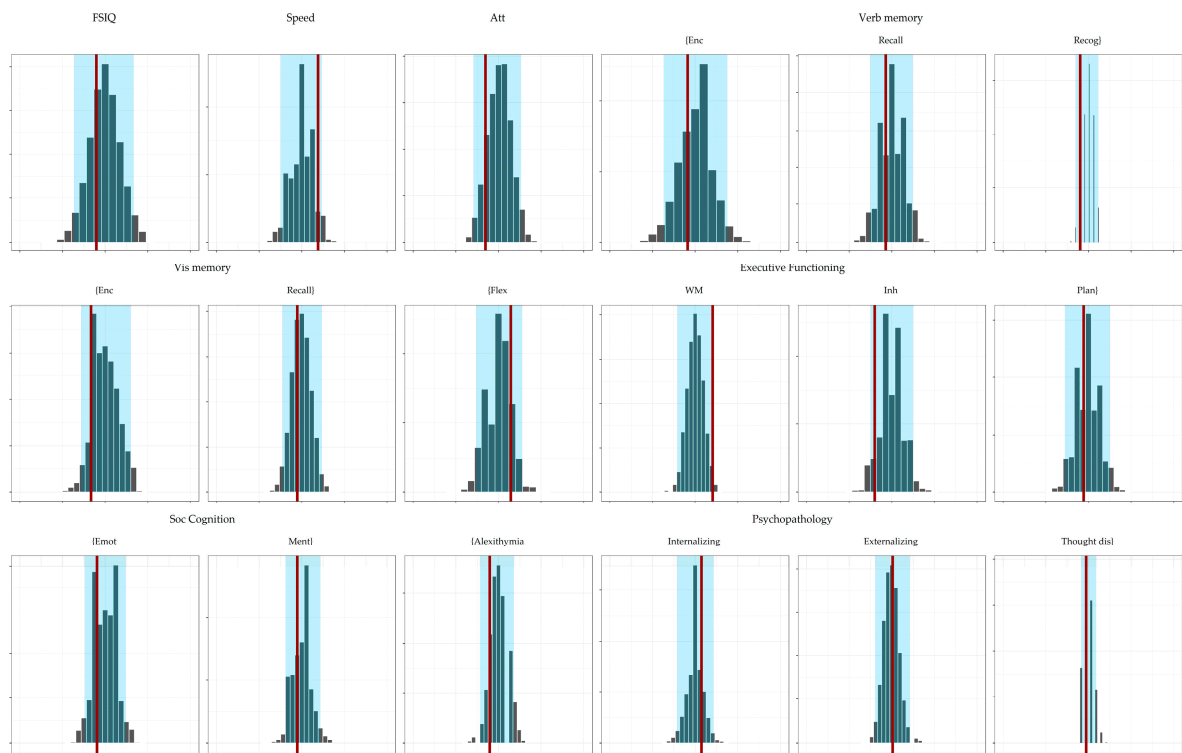

**Figure S3.** Bootstrap distribution of point estimates (the difference in means between younger patients, aged  $\leq 16$ , and older patients, aged  $> 16$ ) centered around zero (no difference in means).
