# Supplementary material for: Cognitive Phenotype and Psychopathology in Noonan Syndrome Spectrum Disorders through Various Ras/MAPK Pathway Associated Gene Variants
Source: MDPI journal article supplement (doi:10.3390/jcm11164735), 2022-08-13
Supplement: s1 [file s1]

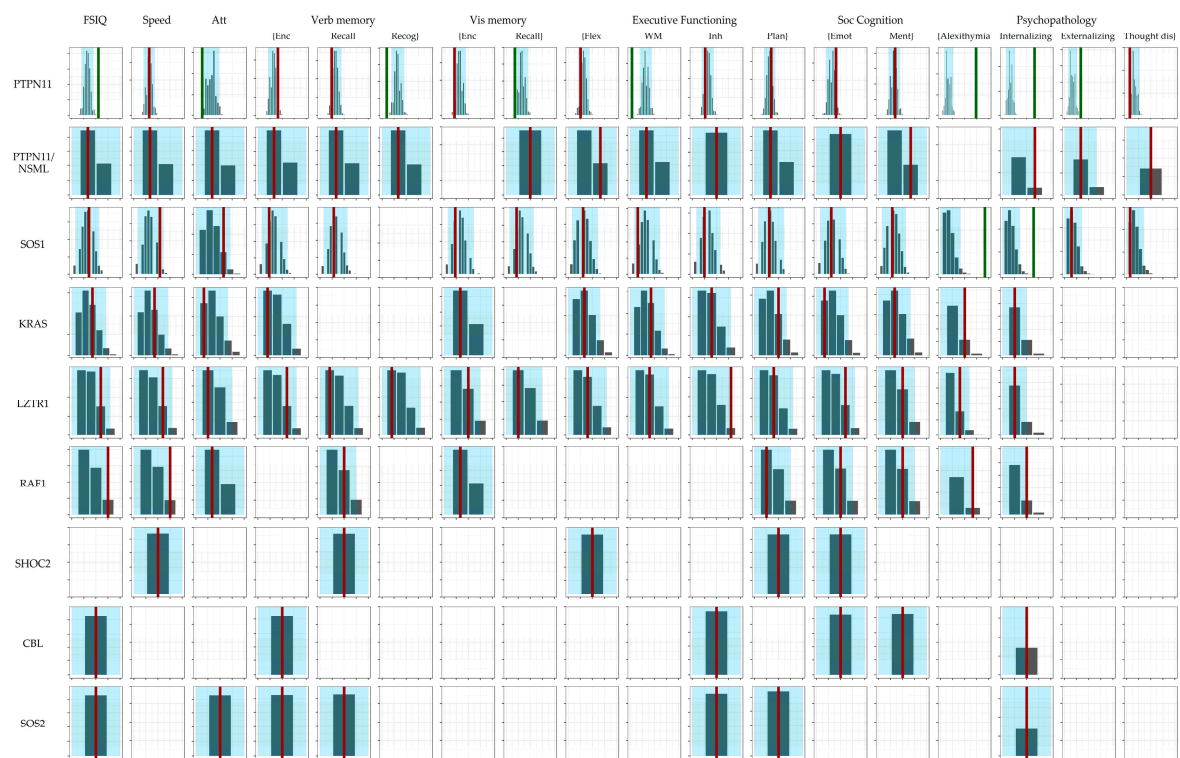

**Figure S1.** Bootstrap distribution of point estimates (percentage of deviant scores) centered around the expected probability of deviant scores (either 32% or 16%).
