# Supplementary material for: Cognitive Phenotype and Psychopathology in Noonan Syndrome Spectrum Disorders through Various Ras/MAPK Pathway Associated Gene Variants
Source: MDPI journal article supplement (doi:10.3390/jcm11164735), 2022-08-13
Supplement: s1 [file s1]

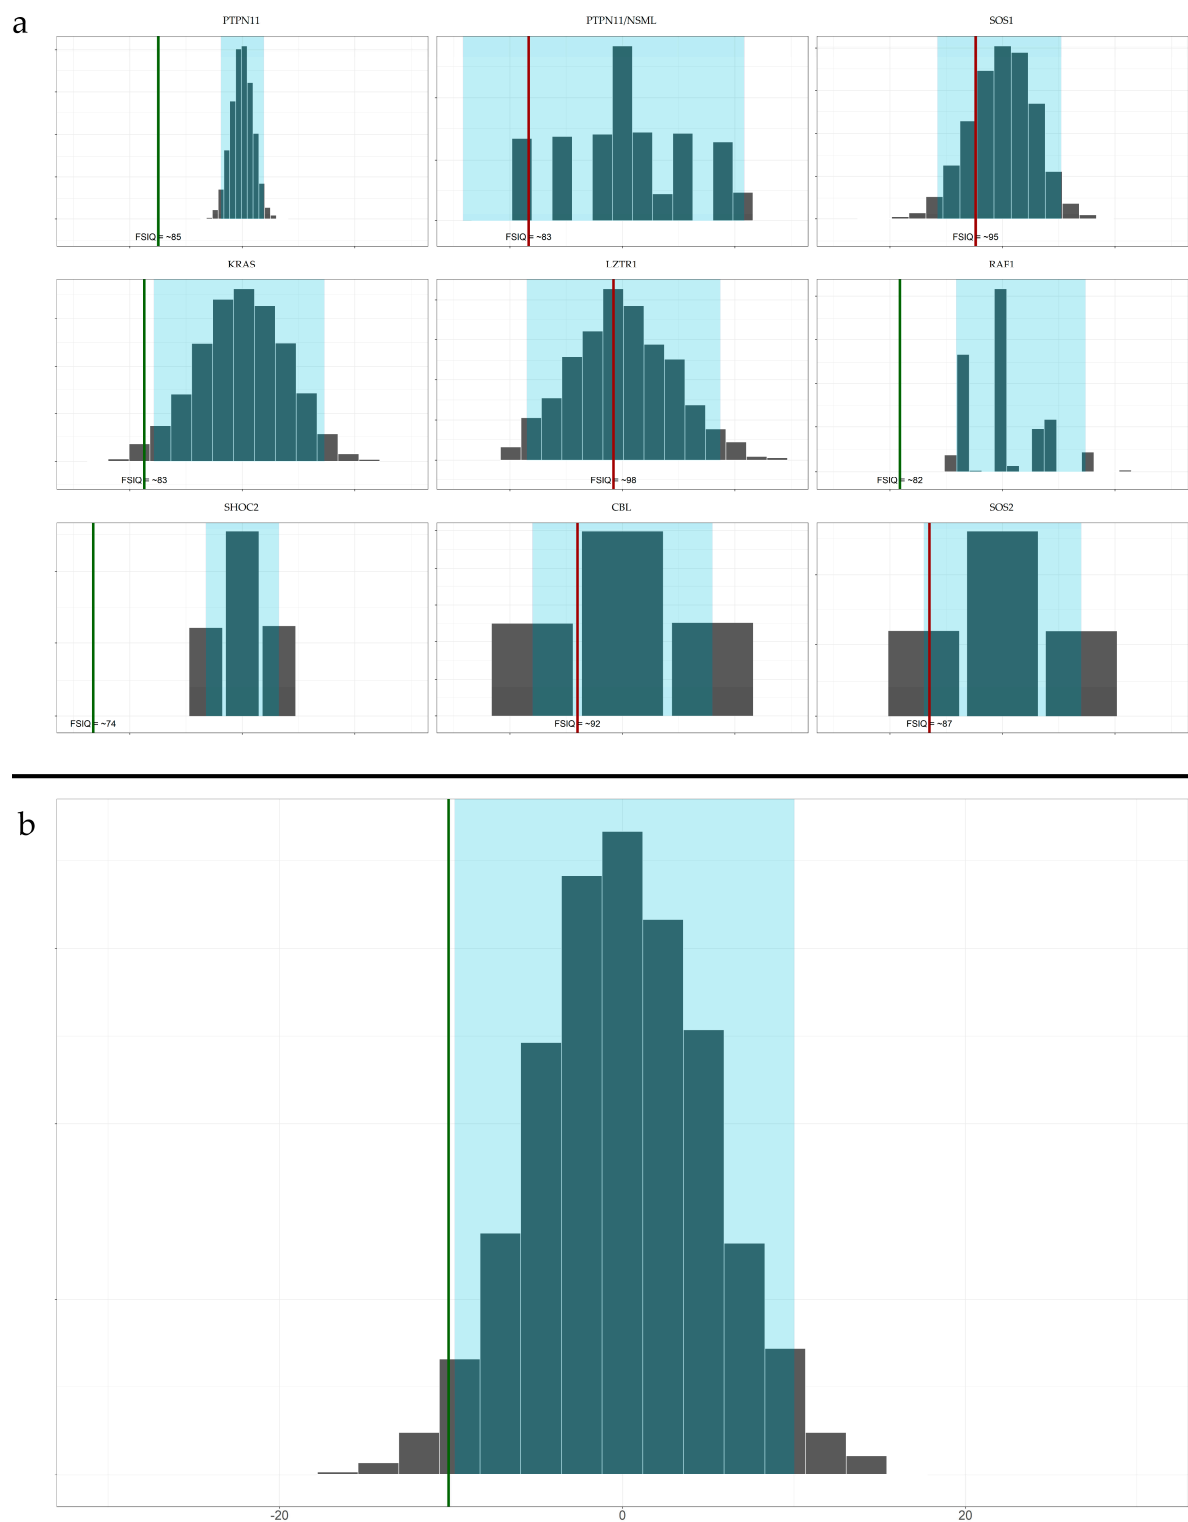

**Figure S2.** (a) Bootstrap distribution of point estimates (observed FSIQs) centered around the expected FSIQ of 100, (b) Bootstrap distribution of point estimates (difference in mean FSIQ between PTPN11 and SOS1) centered around zero (no difference in means).
